# Supplementary material for: Development and Implementation of an Ambulatory Integrated Care Pathway for Major Depressive Disorder and Alcohol Dependence
Source: Atypon-hosted journal article supplement (doi:10.1176/appi.ps.201500115), 2015-08-17
Supplement: appi.ps.201500115.ds001.pdf [file appi.ps.201500115.ds001.pdf]

**ONLINE APPENDIX 1: Early Outcomes – Patient Satisfaction Survey (n=8)**

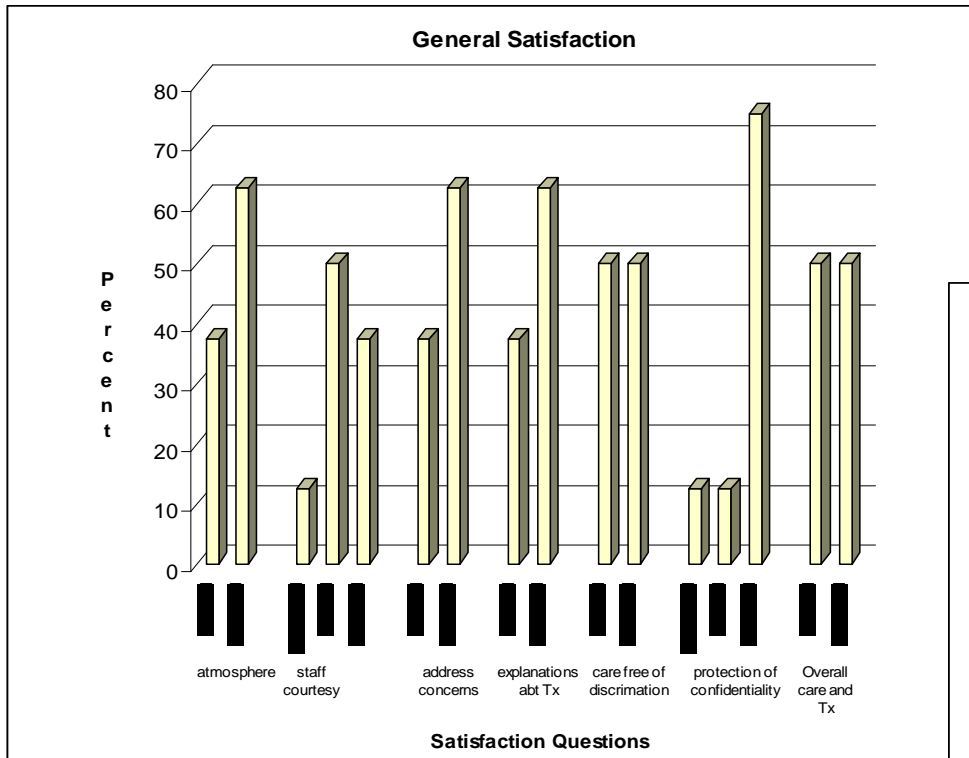

**QIDS scores of 15.1 versus 9.3,  $p < .03$**

**BDI scores of 28.3 versus 16.7,  $p < .003$**

**Reduction in the % of heavy drinking days from 42% to 23%,  $p < .04$**

**Preliminary results: Reduction in symptoms**

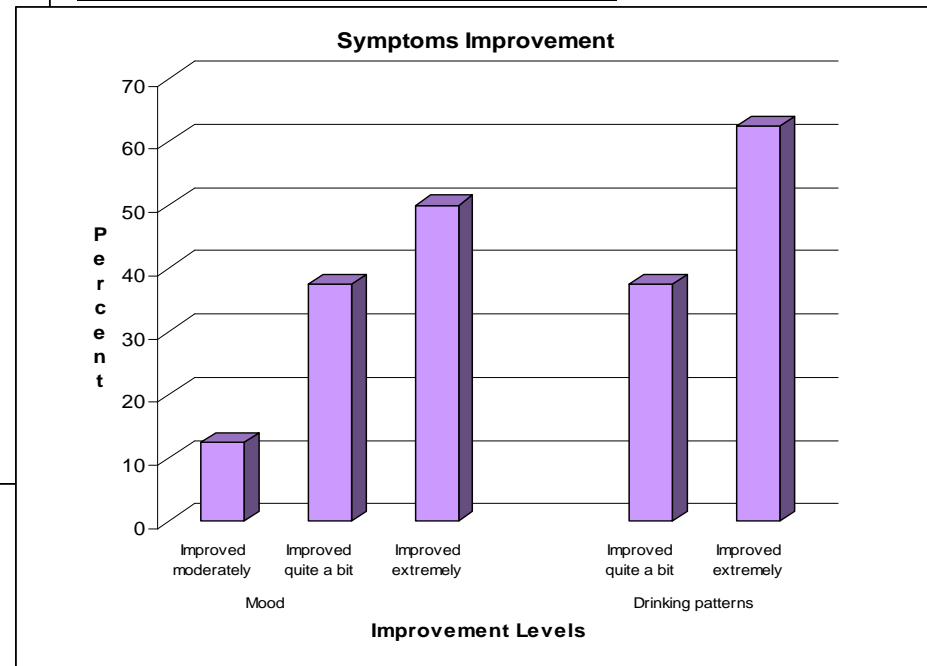

## ONLINE APPENDIX 2: High Level Process Map

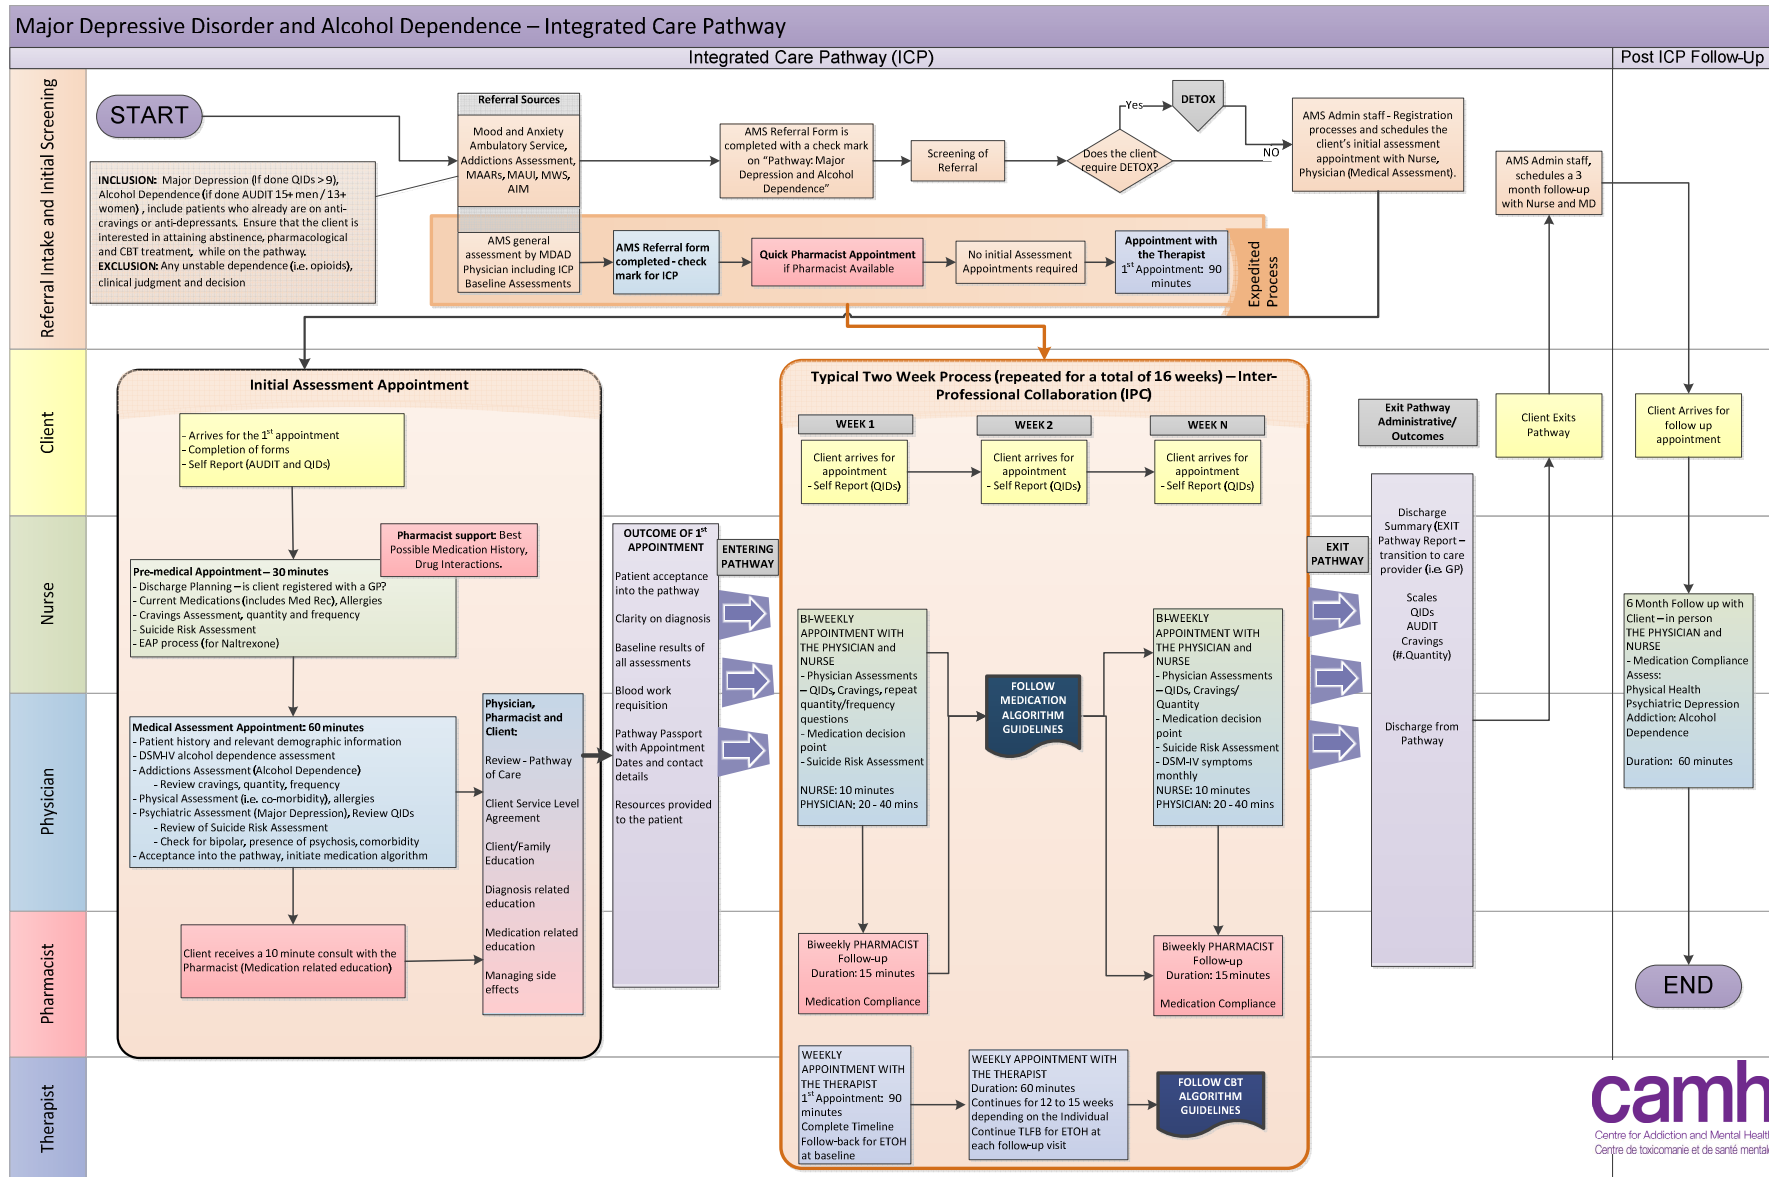

**ONLINE APPENDIX 3: Visual of Medication Algorithm**

| Pharmacotherapy for Major Depression and Alcohol Dependence                                                                                                                                                                           |                      |                |            |            |            |            |            |            |            |            |            |            |            |                                                                                                                                        |            |            |            |            |            |            |            |            |            |                                                                               |            |            |            |            |            |
|---------------------------------------------------------------------------------------------------------------------------------------------------------------------------------------------------------------------------------------|----------------------|----------------|------------|------------|------------|------------|------------|------------|------------|------------|------------|------------|------------|----------------------------------------------------------------------------------------------------------------------------------------|------------|------------|------------|------------|------------|------------|------------|------------|------------|-------------------------------------------------------------------------------|------------|------------|------------|------------|------------|
| <i>*Antidepressants algorithm is adapted from the Texas Medication Algorithm</i>                                                                                                                                                      |                      |                |            |            |            |            |            |            |            |            |            |            |            |                                                                                                                                        |            |            |            |            |            |            |            |            |            |                                                                               |            |            |            |            |            |
| Antidepressant Trials:<br>Trial A - Sertraline (Fluoxetine, Venlafaxine XR, Mirtazapine -if Sertraline previously tried and failed)<br>Trial B - Untried drug from Trial A Group<br>Trial C - Untried drug from Trials A and B Groups |                      |                |            |            |            |            |            |            |            |            |            |            |            |                                                                                                                                        |            |            |            |            |            |            |            |            |            |                                                                               |            |            |            |            |            |
| Type                                                                                                                                                                                                                                  | Medication           | Dose           | Week 1     |            |            |            |            |            |            | Week 2     |            |            |            |                                                                                                                                        |            |            | Week 3     |            |            |            |            |            |            | Week 4                                                                        | Week 5     | Week 6     | Week 7     | Week 8     | Max Dose   |
|                                                                                                                                                                                                                                       |                      |                | Day 1      | 2          | 3          | 4          | 5          | 6          | 7          | 8          | 9          | 10         | 11         | 12                                                                                                                                     | 13         | 14         | 15         | 16         | 17         | 18         | 19         | 20         | 21         | 22-28                                                                         | 29-35      | 36-42      | 43-49      | 50         |            |
| Antidepressants                                                                                                                                                                                                                       | Sertraline           | mg AM          | 25         | 25         | 25         | 25         | 25         | 25         | 25         | 50         | 50         | 50         | 50         | 50                                                                                                                                     | 50         | 50         | 50         | 50         | 50         | 50         | 50         | 50         | 50         | Increase dose by 50 mg every 2-4 weeks depending on tolerability and response |            |            |            |            | 200 mg/day |
|                                                                                                                                                                                                                                       | Fluoxetine           | mg AM          | 10         | 10         | 10         | 10         | 10         | 10         | 10         | 20         | 20         | 20         | 20         | 20                                                                                                                                     | 20         | 20         | 20         | 20         | 20         | 20         | 20         | 20         | 20         | Increase dose by 20 mg every 4 weeks depending on tolerability and response   |            |            |            |            | 80 mg/day  |
|                                                                                                                                                                                                                                       | Venlafaxine XR       | mg AM          | 37.5       | 37.5       | 37.5       | 37.5       | 37.5       | 37.5       | 75         | 75         | 75         | 75         | 75         | 75                                                                                                                                     | 75         | 75         | 75         | 75         | 75         | 75         | 75         | 75         | 75         | Increase dose by 75 mg every 2-4 weeks depending on tolerability and response |            |            |            |            | 375 mg/day |
|                                                                                                                                                                                                                                       | Mirtazapine          | mg QHS         | 15         | 15         | 15         | 15         | 15         | 15         | 15         | 30         | 30         | 30         | 30         | 30                                                                                                                                     | 30         | 30         | 30         | 30         | 30         | 30         | 30         | 30         | 30         | Increase dose by 15 mg every 2-4 weeks depending on tolerability and response |            |            |            |            | 60 mg/day  |
| Anti-craving                                                                                                                                                                                                                          | Trial 1: Naltrexone  | mg/day         | 25         | 25         | 50         | 50         | 50         | 50         | 50         | 50         | 50         | 50         | 50         | 50                                                                                                                                     | 50         | 50         | 50         | 50         | 50         | 50         | 50         | 50         | 50         | 50                                                                            | 50         | 50         | 50         | 50         | 50 mg/day  |
|                                                                                                                                                                                                                                       | Trial 2: Acamprosate | mg TID         | 333 mg TID | 333 mg TID | 666 mg TID                                                                                                                             | 666 mg TID | 666 mg TID | 666 mg TID | 666 mg TID | 666 mg TID | 666 mg TID | 666 mg TID | 666 mg TID | 666 mg TID | 666 mg TID                                                                    | 666 mg TID | 666 mg TID | 666 mg TID | 666 mg TID |            |
|                                                                                                                                                                                                                                       | Trial 3: Topiramate  | mg AM<br>mg PM |            |            |            |            |            |            |            |            |            |            |            |                                                                                                                                        |            |            | 25         | 25         | 25         | 25         | 25         | 25         | 25         | 25                                                                            | 25         | 25         | 25         | 300 mg/day |            |
| <b>Criteria for Anti-Craving Medication Treatment Non-Responders</b>                                                                                                                                                                  |                      |                |            |            |            |            |            |            |            |            |            |            |            | <b>Criteria for Anti-Craving Medication Switch</b>                                                                                     |            |            |            |            |            |            |            |            |            |                                                                               |            |            |            |            |            |
| Treatment non-Responder will have more than 7 (women) or 14 (men) drinks per week on average.<br>OR<br>More than 1 day on which more than 3 drinks (women) or 4 drinks (men) were consumed over the period of 2 weeks.                |                      |                |            |            |            |            |            |            |            |            |            |            |            | Being defined as a Treatment non-Responder at 3 consecutive visits will trigger a switch of anti-craving medication to the next level. |            |            |            |            |            |            |            |            |            |                                                                               |            |            |            |            |            |

**Pharmacotherapy Decision Point Guideline: Adapted from the Texas Medication Algorithm**

| <b>Tactics and Critical Decision Point and Critical Status Plan for the Treatment of Major Depressive Disorder</b>                                                           |                                                                                                                                                                                                                |                                                                                                                                     |                                                                                                                                     |                                                                                                             |                                                                                                                                       |
|------------------------------------------------------------------------------------------------------------------------------------------------------------------------------|----------------------------------------------------------------------------------------------------------------------------------------------------------------------------------------------------------------|-------------------------------------------------------------------------------------------------------------------------------------|-------------------------------------------------------------------------------------------------------------------------------------|-------------------------------------------------------------------------------------------------------------|---------------------------------------------------------------------------------------------------------------------------------------|
| <b>STARTING POINT → Week 0 (CDP#1) QIDS ≥ 9 Symptomatic    PLAN → Initiate antidepressant medication; adjust dose to lower end of therapeutic dose range or serum level.</b> |                                                                                                                                                                                                                |                                                                                                                                     |                                                                                                                                     |                                                                                                             |                                                                                                                                       |
| <b>QIDS-C16 SCORE</b>                                                                                                                                                        | <b>Week 2</b>                                                                                                                                                                                                  | <b>Week 4</b>                                                                                                                       | <b>Week 6</b>                                                                                                                       | <b>Week 9</b>                                                                                               | <b>Week 12</b>                                                                                                                        |
| QIDS ≤ 5 (Remission)                                                                                                                                                         | Continue current dose.                                                                                                                                                                                         |                                                                                                                                     |                                                                                                                                     |                                                                                                             | Go to follow-up phase.                                                                                                                |
| QIDS = 6-8 (Partial Response)                                                                                                                                                | Gradually increase dose as tolerated.                                                                                                                                                                          | <ul style="list-style-type: none"> <li>Continue current dose.</li> <li>Consider increasing dose.</li> </ul>                         | Increase/maximize dose.                                                                                                             | <ul style="list-style-type: none"> <li>Increase dose.</li> <li>Switch to another antidepressant.</li> </ul> | <ul style="list-style-type: none"> <li>Switch to another antidepressant.</li> <li>Increase dose and reevaluate in 2 weeks.</li> </ul> |
| QIDS = 6-8 (SEs intolerable)                                                                                                                                                 | <ul style="list-style-type: none"> <li>Continue current dose and address Side Effects (SEs).</li> <li>Decrease dose and continue for 2 additional weeks.</li> <li>Switch to another antidepressant.</li> </ul> | <ul style="list-style-type: none"> <li>Continue current dose and address SEs.</li> <li>Switch to another antidepressant.</li> </ul> | <ul style="list-style-type: none"> <li>Continue current dose and address SEs.</li> <li>Switch to another antidepressant.</li> </ul> |                                                                                                             |                                                                                                                                       |
| QIDS ≥ 9 (Non-response)                                                                                                                                                      | Gradually increase dose as tolerated.                                                                                                                                                                          | <ul style="list-style-type: none"> <li>Increase dose.</li> <li>Switch to another antidepressant.</li> </ul>                         | Switch to another antidepressant.                                                                                                   | Switch to another antidepressant.                                                                           | Switch to another antidepressant.                                                                                                     |
| QIDS ≥ 9 (SEs intolerable)                                                                                                                                                   | <ul style="list-style-type: none"> <li>Decrease dose and continue for 2 additional weeks.</li> <li>Switch to another antidepressant.</li> </ul>                                                                | <ul style="list-style-type: none"> <li>Switch to another antidepressant.</li> </ul>                                                 |                                                                                                                                     |                                                                                                             |                                                                                                                                       |
